# Supplementary material
Source: PubMed Central journal article supplement (PMC7804209)

Supplementary Figure 1

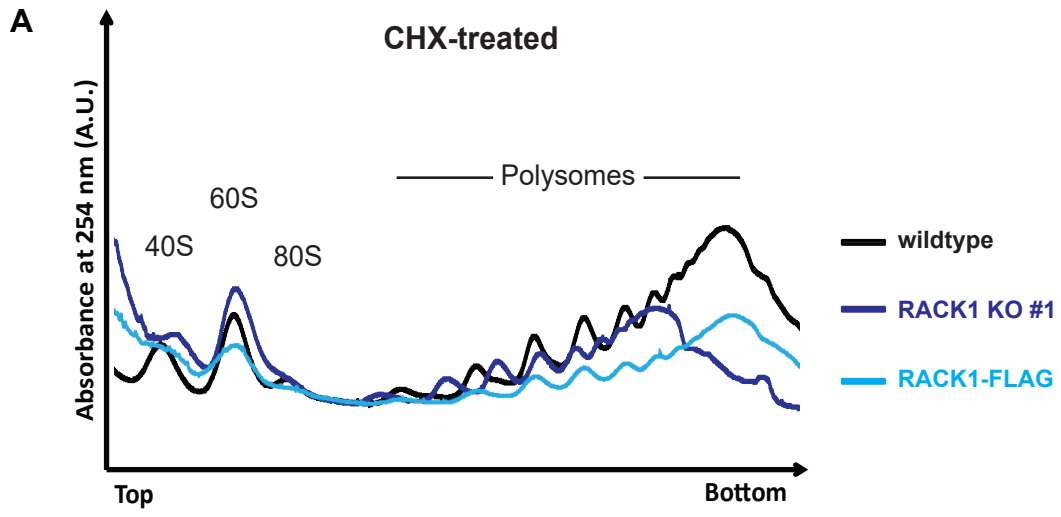

Supplement: NIHMS1579344-supplement-3.pdf [file NIHMS1579344-supplement-3.pdf]

Supplementary Figure 2

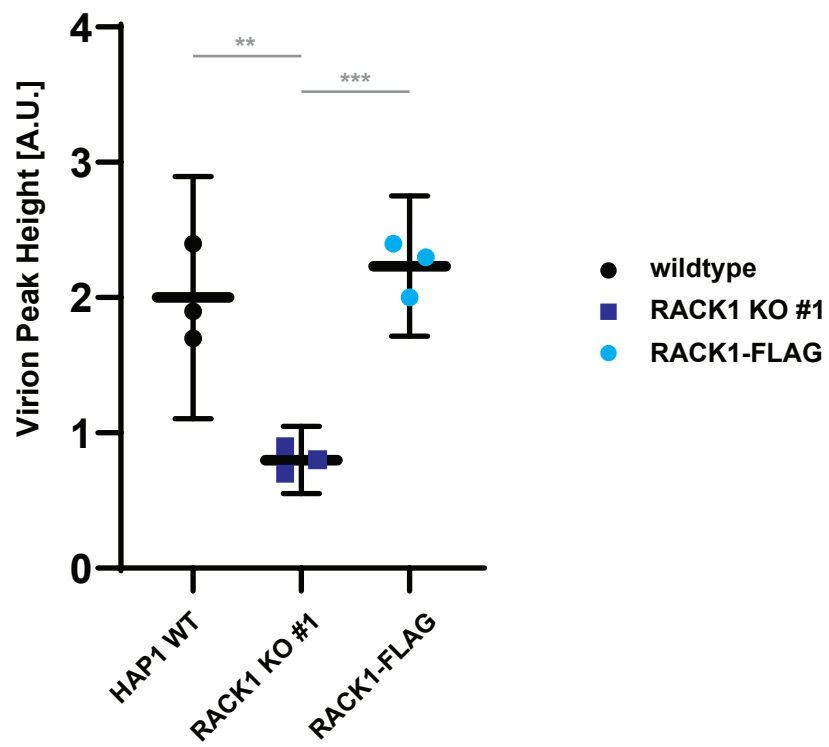

Supplement: NIHMS1579344-supplement-4.pdf [file NIHMS1579344-supplement-4.pdf]
